# Supplementary material for: Heated Tobacco Products and Nicotine Pouches: A Survey of People with Experience of Smoking and/or Vaping in the UK
Source: MDPI journal article supplement (doi:10.3390/ijerph18168852), 2021-08-22
Supplement: s1 [file s1]

# Heated tobacco products and nicotine pouches: A survey of people with experience of smoking and/or vaping in the UK.

Leonie S. Brose, Máirtín McDermott, Ann McNeill

## Supplemental material

**Table S1. Bivariate associations between ever use of, and interest in HTPs, ever use of nicotine pouches and socio-demographics and smoking & vaping status, n=3883 for ever use, n=1199 for interest**

|                  | HTP ever use <sup>1</sup>  |                  | HTP interest            |                  | Nicotine Pouches ever use  |                  |
|------------------|----------------------------|------------------|-------------------------|------------------|----------------------------|------------------|
|                  | OR (95 CI)                 | p                | OR (95 CI)              | p                | OR (95 CI)                 | p                |
| <b>Gender</b>    |                            |                  |                         |                  |                            |                  |
| Male             | 1.00 (0.77 - 1.30)         | 0.98             | 0.84 (0.66-1.05)        | 0.128            | <b>1.41 (1.03 - 1.92)</b>  | <b>0.030</b>     |
| Female           | Ref                        |                  | Ref                     |                  | Ref                        |                  |
| <b>Age</b>       |                            |                  |                         |                  |                            |                  |
| 18-24            | <b>8.40 (3.70 - 19.09)</b> | <b>&lt;0.001</b> | <b>3.62 (2.05-6.39)</b> | <b>&lt;0.001</b> | <b>9.61 (3.31 - 27.89)</b> | <b>&lt;0.001</b> |
| 25-34            | <b>8.68 (3.97 - 18.98)</b> | <b>&lt;0.001</b> | <b>4.51 (2.81-7.26)</b> | <b>&lt;0.001</b> | <b>11.89 (4.3 - 32.88)</b> | <b>&lt;0.001</b> |
| 35-44            | <b>6.28 (2.86 - 13.77)</b> | <b>&lt;0.001</b> | <b>3.67 (2.32-5.80)</b> | <b>&lt;0.001</b> | <b>7.98 (2.87 - 22.21)</b> | <b>&lt;0.001</b> |
| 45-54            | 2.28 (0.99 - 5.25)         | 0.054            | <b>1.95 (1.26-3.01)</b> | <b>0.003</b>     | 2.55 (0.86 - 7.56)         | 0.093            |
| 55-65            | <b>2.37 (1.00 - 5.59)</b>  | <b>0.049</b>     | <b>1.98 (1.27-3.08)</b> | <b>0.003</b>     | 1.86 (0.58 - 5.97)         | 0.296            |
| Over 65          | Ref                        |                  | Ref                     |                  | Ref                        |                  |
| <b>Ethnicity</b> |                            |                  |                         |                  |                            |                  |
| Not white        | <b>1.87 (1.29 - 2.70)</b>  | <b>0.001</b>     | 1.21 (0.81-1.79)        | 0.352            | <b>2.1 (1.39 - 3.18)</b>   | <b>&lt;0.001</b> |
| White            | Ref                        |                  | Ref                     |                  | Ref                        |                  |
| <b>Education</b> |                            |                  |                         |                  |                            |                  |
| Some university  | <b>3.04 (2.28 - 4.03)</b>  | <b>&lt;0.001</b> | <b>1.34 (1.07-1.68)</b> | <b>0.011</b>     | <b>3.37 (2.39 - 4.75)</b>  | <b>&lt;0.001</b> |
| No university    | Ref                        |                  | Ref                     |                  | Ref                        |                  |
| <b>Region</b>    |                            |                  |                         |                  |                            |                  |
| Greater London   | <b>2.27 (1.69 - 3.05)</b>  | <b>&lt;0.001</b> | <b>1.38 (1.02-1.87)</b> | <b>0.038</b>     | <b>2.80 (1.98 - 3.96)</b>  | <b>&lt;0.001</b> |
| Wales            | 0.39 (0.14 - 1.07)         | 0.066            | 0.86 (0.49-1.49)        | 0.586            | 0.32 (0.08 - 1.30)         | 0.110            |
| Scotland         | 0.66 (0.37 - 1.17)         | 0.157            | 0.74 (0.48-1.15)        | 0.176            | 1.43 (0.84 - 2.43)         | 0.184            |
| Northern Ireland | 0.62 (0.19 - 1.99)         | 0.422            | 1.85 (0.85-4.00)        | 0.119            | 1.02 (0.32 - 3.29)         | 0.973            |

|                        | HTP ever use <sup>1</sup> |                  | HTP interest            |                  | Nicotine Pouches ever use |                  |
|------------------------|---------------------------|------------------|-------------------------|------------------|---------------------------|------------------|
|                        | OR (95 CI)                | p                | OR (95 CI)              | p                | OR (95 CI)                | p                |
| England excl London    | Ref                       |                  | Ref                     |                  | Ref                       |                  |
| <b>Smoking /Vaping</b> |                           |                  |                         |                  |                           |                  |
| Not smoking or vaping  | 0.71 (0.44-1.16)          | 0.176            | <b>0.31 (0.21-0.46)</b> | <b>&lt;0.001</b> | 1.14 (0.68-1.90)          | 0.621            |
| Smoking and vaping     | <b>3.01 (2.29-4.11)</b>   | <b>&lt;0.001</b> | <b>1.60 (1.19-2.15)</b> | <b>0.002</b>     | <b>3.38 (2.38-4.81)</b>   | <b>&lt;0.001</b> |
| Vaping only            | 0.73 (0.44-1.19)          | 0.206            | 0.76 (0.55-1.04)        | 0.090            | 0.68 (0.36-1.29)          | 0.238            |
| Smoking only           | Ref                       |                  | Ref                     |                  | Ref                       |                  |
